# Supplementary material
Source: PubMed Central journal article supplement (PMC3654688)
Supplement: NIHMS254074-supplement-1_si_001.pdf [file NIHMS254074-supplement-1_si_001.pdf]

## Utilizing Spectral Counting to Quantitatively Characterize Tandem Removal of Abundant Proteins (TRAP) in Human Plasma

Christopher M. Shuford<sup>1</sup>, Adam M. Hawkrigde<sup>1</sup>, John C. Burnett, Jr.<sup>2</sup>, and David C. Muddiman<sup>1\*</sup>

<sup>1</sup>W.M. Keck FT-ICR Mass Spectrometry Laboratory, Department of Chemistry, North Carolina State University, Raleigh, North Carolina, 27695

<sup>2</sup>Division for Cardiovascular Disease, Mayo Clinic College of Medicine, Rochester, Minnesota 55905

### Abstract

Herein are supporting information to the above titled article. The contents include specific details on the chromatographic parameters used to perform the tandem depletions, results from a 1D-SDS-PAGE analysis of the various depletion samples, additional spectral counting data analysis, as well as the raw spectral counting data for all proteins identified in these studies.

### Tandem Abundant Protein Depletions

Shown in **Figure S-1** are representative chromatograms for the three depletion setups evaluated. The gradients employed in both TRAP setups were lengthened to accommodate for the increased bed volume of the system and are outline in **Table S-1**. More specifically, the length of the initial binding step was increased to allow the targeted proteins sufficient time to interact with and bind to the columns. It should be noted when connecting the columns in series a marginal pressure increase was observed for the system; however, by minimizing the total length of all connecting tubing, the total back pressure was kept well below the maximum operating pressure for these columns.

### 1D-SDS-PAGE

In order to visually inspect the quality of the protein depletions, each sample was run by 1D-SDS-PAGE. One aliquot from the raw, un-depleted plasma and each depleted sample was diluted 2-fold with Laemmli sample buffer and boiled for 5 minutes. Thirteen micrograms of total protein from each denatured sample was then loaded onto the 12.5% Tris-HCl gel and run for 55 minutes at a constant 200 V according to the manufacturer's specifications in Tris/Glycine/SDS running. The gel was briefly rinsed three times with water, stained for 60 minutes with Bio-Safe Coomassie Stain, and rinsed for 30 additional minutes with water prior to capturing the image with a ChemiDoc XRS imaging system. All

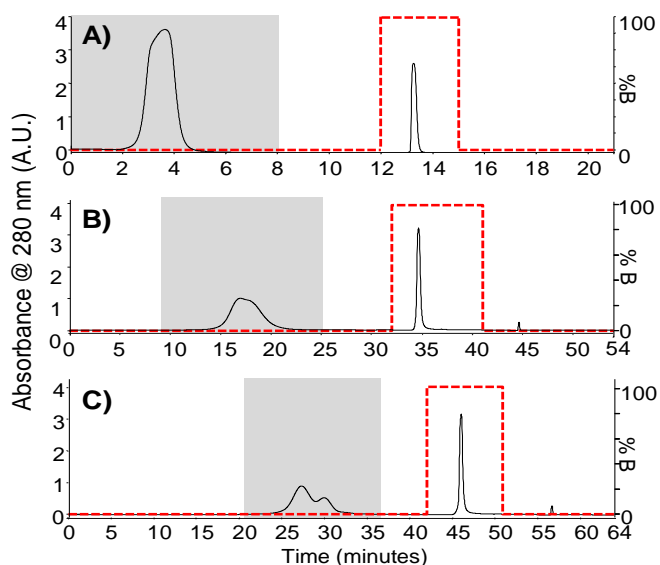

**Figure S-1** - Chromatograms obtained from A) HSA depletion, B) HSA/Hu14 tandem depletion, and C) HSA/Hu14/Hu14 tandem depletion of pooled human plasma. The red line indicates the gradient profile used for each depletion setup and the grey boxes show the retention window of the unbound protein fraction that was collected for bottom-up proteomic analysis.

supplies utilized herein for this analysis were from Bio-Rad (Hercules, CA). The gel image obtained for each sample is shown in **Figure S-2**. As expected, the bands corresponding to the abundant plasma

**Table S-1 - Gradient Time Tables**

| A - HSA Depletion |                   |     | B - HSA/Hu14 Depletion |                   |     | C - HSA/Hu14/Hu14 Depletion |                   |     |
|-------------------|-------------------|-----|------------------------|-------------------|-----|-----------------------------|-------------------|-----|
| time              | flowrate (mL/min) | % B | time                   | flowrate (mL/min) | % B | time                        | flowrate (mL/min) | % B |
| 0.00              | 0.250             | 0   | 0.00                   | 0.125             | 0   | 0.00                        | 0.125             | 0   |
| 10.00             | 0.250             | 0   | 30.00                  | 0.125             | 0   | 40.00                       | 0.125             | 0   |
| 10.01             | 1.000             | 0   | 30.01                  | 1.000             | 0   | 40.01                       | 1.000             | 0   |
| 12.00             | 1.000             | 0   | 32.00                  | 1.000             | 0   | 42.00                       | 1.000             | 0   |
| 12.01             | 1.000             | 100 | 32.01                  | 1.000             | 100 | 42.01                       | 1.000             | 100 |
| 15.00             | 1.000             | 100 | 41.00                  | 1.000             | 100 | 51.00                       | 1.000             | 100 |
| 15.01             | 1.000             | 0   | 41.01                  | 1.000             | 0   | 51.01                       | 1.000             | 0   |
| 21.00             | 1.000             | 0   | 54.00                  | 1.000             | 0   | 64.00                       | 1.000             | 0   |

proteins were noticeably diminished across the samples and many additional protein bands corresponding to less abundant proteins were visualized in the TRAP samples. For instance, the band corresponding to HSA (67 kDa) was prominent in the un-depleted sample and was unobserved in all depleted samples. Several target abundant proteins were also observed as dark bands in sample A, but were no longer present in the TRAP samples. Moreover, many more protein bands were visualized in samples B and C compared to the un-depleted plasma and sample A as a result of the greater protein enrichment in the TRAP samples. The protein bands in sample C, in particular, were also slightly, yet noticeably more intense than those in sample B as a result of the relative enrichment of the proteins afforded to sample C by the additional Hu14 removal column. Even though this was an expected outcome based on the Bradford assay results, it was interesting the improvement was observable in the gel image.

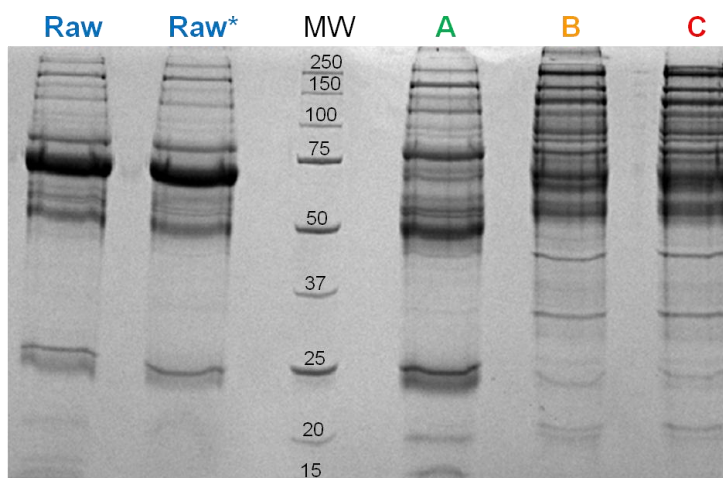

**Figure S-2** - 1D-SDS-PAGE image of the raw, un-depleted plasma and unbound fractions from A) HSA depleted, B) HSA/Hu14 tandem depleted, and C) HSA/Hu14/Hu14 tandem depleted plasma. The un-depleted plasma run in the second lane (Raw\*) served as a control and was produced by running an aliquot of un-depleted plasma through the entire sample work-up process (e.g., filtering, concentrating, buffer exchange, etc.) yet without depletion. The units for the molecular weight markers (MW) are in kDa.

### Spectral Counting Improvements

Shown in **Figure S-3** are plots comparing the normalized spectral counts for proteins identified between successive samples. The slopes of the resulting lines give an estimate of the average improvement in spectral counts for all proteins identified between the two samples. In the first plot, the normalized spectral counts for proteins identified in the un-depleted plasma are plotted on the x-axis and

the corresponding normalized spectral counts from sample A are plotted on the y-axis. Based on the slope of the regression line, the normalized spectral counts increased roughly 2.4-fold from the undepleted plasma to the HSA depleted plasma, which is comparable with the 2.8-fold enrichment factor estimated by the Bradford assays. From sample A to sample B, the improvement in spectral counts was estimated to be 2.0-fold. In this case the increase in spectral counts did not correspond with the 4.9-fold difference in total protein mass measured between these two samples; however, the discrepancy between the two measurements was not unexpected given the substantial change in the protein matrix. Between samples B and C, the 1.1-fold increase in spectral counts was consistent with the 1.15-fold difference in total protein mass and, again, demonstrates the benefit of using multiple depletion columns in tandem. In all cases, the regression lines showing the increase in spectral counts were obtained with correlation coefficients ( $R^2$ ) greater than 0.9, which suggests the improvements were real. In each case shown, the data was also subjected to the Wilcoxon Signed Rank Test to determine if the difference in the normalized spectral counts was statistically significant. This test was chosen because it is a non-parametric test and, as such, does not assume the data is normally distributed. In all cases the *p-value* of the test statistic was less than 0.001, indicating the normalized spectral counts between the respective samples were statistically different and the observed increase real.

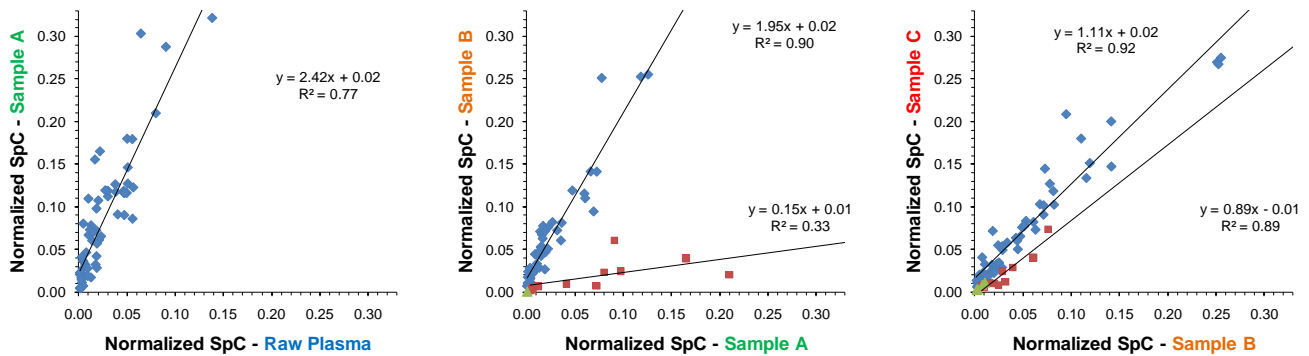

**Figure S-3** - Scatter plots comparing the normalized spectral counts between A) raw, un-depleted plasma and HSA depleted plasma, B) HSA depleted plasma and HSA/Hu14 tandem depleted plasma, and C) HSA/Hu14 tandem depleted plasma and HSA/Hu14/Hu14 tandem depleted plasma. Only proteins that were identified within both samples were included in the plots. The blue markers represent proteins that experienced an increase in spectral counts between the two samples, while red markers represent those that demonstrated a decrease. The green markers represent those proteins whose spectral counts remained constant between samples. Note, only the top scoring proteins from each protein group were utilized in these plots.

## Raw Spectral Counting Data

Compiled in the subsequent table is the raw spectral counting data obtained for all proteins identified in these studies across the four samples. The proteins are organized by group number and the top scoring protein in each group is indicated as such. The normalized spectral count values were calculated by dividing the total spectral counts (average  $\times$  3) obtained for a given protein and dividing it by the number of amino acids in the annotated protein sequence (*i.e.*, the protein length, L). Also reported in this table is the standard deviation of the average spectral counts obtained across the three technical replicates.

Table S-2

|         |           | Sequence Information |                                                             |             |               | Raw Plasma   |              | Sample A     |              | Sample B     |              | Sample C     |  |
|---------|-----------|----------------------|-------------------------------------------------------------|-------------|---------------|--------------|--------------|--------------|--------------|--------------|--------------|--------------|--|
| Group # | Top Hit ? | Sequence ID          | Sequence Name                                               | L (aa)      | Avg SpC       | SpC StDev    | Avg SpC      | SpC StDev    | Avg SpC      | SpC StDev    | Avg SpC      | SpC StDev    |  |
| 1       | Yes       | <b>IPI00745872.2</b> | <b>Isoform 1 of Serum albumin</b>                           | <b>609</b>  | <b>106.33</b> | <b>10.12</b> |              |              |              |              |              |              |  |
| 1       | No        | IPI00022434.4        | Putative uncharacterized protein ALB                        | 627         | 96.00         | 8.72         |              |              |              |              |              |              |  |
| 1       | No        | IPI00908876.1        | cDNA FLJ50830, highly similar to Serum albumin              | 523         | 88.33         | 9.29         |              |              |              |              |              |              |  |
| 1       | No        | IPI00878517.1        | Putative uncharacterized protein ALB                        | 494         | 86.67         | 9.29         |              |              |              |              |              |              |  |
| 1       | No        | IPI00216773.4        | ALB protein                                                 | 396         | 58.67         | 4.73         |              |              |              |              |              |              |  |
| 1       | No        | IPI00878282.1        | Putative uncharacterized protein ALB                        | 197         | 28.67         | 3.21         |              |              |              |              |              |              |  |
| 2       | Yes       | <b>IPI00418163.3</b> | <b>complement component 4B preproprotein</b>                | <b>1744</b> | <b>2.33</b>   | <b>0.58</b>  | <b>15.67</b> | <b>4.04</b>  | <b>47.67</b> | <b>16.56</b> | <b>59.67</b> | <b>17.79</b> |  |
| 2       | No        | IPI00892604.1        | Complement component C4B (Childo blood group) 2             | 1744        | 2.33          | 0.58         | 15.67        | 4.04         | 47.67        | 16.56        | 59.67        | 17.79        |  |
| 2       | No        | IPI00887154.2        | Complement component 4B                                     | 1744        | 2.33          | 0.58         | 15.67        | 4.04         | 47.67        | 16.56        | 59.67        | 17.79        |  |
| 3       | Yes       | <b>IPI00022463.1</b> | <b>Serotransferrin</b>                                      | <b>698</b>  | <b>15.00</b>  | <b>7.21</b>  | <b>70.67</b> | <b>17.62</b> |              |              |              |              |  |
| 3       | No        | IPI00798216.1        | 12 kDa protein                                              | 105         | 5.00          | 2.65         | 16.00        | 4.36         |              |              |              |              |  |
| 3       | No        | IPI00798430.2        | 17 kDa protein                                              | 155         | 1.67          | 1.53         | 15.00        | 5.20         |              |              |              |              |  |
| 3       | No        | IPI00877763.1        | Putative uncharacterized protein TF                         | 115         | 3.67          | 1.53         | 10.33        | 1.53         |              |              |              |              |  |
| 3       | No        | IPI00945828.1        | Putative uncharacterized protein TF                         | 120         | 3.67          | 1.53         | 10.33        | 1.53         |              |              |              |              |  |
| 3       | No        | IPI00796467.1        | 11 kDa protein                                              | 102         | 1.33          | 0.58         | 9.00         | 1.00         |              |              |              |              |  |
| 4       | Yes       | <b>IPI00029739.5</b> | <b>Isoform 1 of Complement factor H</b>                     | <b>1231</b> | <b>1.67</b>   | <b>1.15</b>  | <b>15.00</b> | <b>2.65</b>  | <b>33.33</b> | <b>7.23</b>  | <b>48.67</b> | <b>17.04</b> |  |
| 4       | No        | IPI00942414.2        | Isoform 2 of Complement factor H                            | 449         | 1.67          | 1.15         | 10.67        | 1.15         | 20.67        | 4.04         | 29.67        | 14.01        |  |
| 5       | Yes       | <b>IPI00555812.4</b> | <b>Isoform 1 of Vitamin D-binding protein</b>               | <b>474</b>  | <b>2.00</b>   | <b>1.00</b>  | <b>12.33</b> | <b>4.16</b>  | <b>39.67</b> | <b>4.73</b>  | <b>42.67</b> | <b>3.51</b>  |  |
| 5       | No        | IPI00954102.1        | Isoform 2 of Vitamin D-binding protein                      | 352         | 1.00          | 1.00         | 8.33         | 2.52         | 27.33        | 2.31         | 32.67        | 3.06         |  |
| 6       | Yes       | <b>IPI00019591.2</b> | <b>cDNA FLJ55673, highly similar to Complement factor B</b> | <b>1266</b> | <b>1.00</b>   | <b>1.00</b>  | <b>8.00</b>  | <b>1.73</b>  | <b>30.00</b> | <b>9.17</b>  | <b>43.00</b> | <b>10.82</b> |  |
| 6       | No        | IPI00939824.1        | 141 kDa protein                                             | 1266        | 1.00          | 1.00         | 8.00         | 1.73         | 30.00        | 9.17         | 43.00        | 10.82        |  |
| 7       | Yes       | <b>IPI00947496.1</b> | <b>124 kDa protein</b>                                      | <b>1115</b> | <b>1.00</b>   | <b>1.00</b>  | <b>6.00</b>  | <b>1.00</b>  | <b>25.00</b> | <b>7.21</b>  | <b>38.33</b> | <b>8.62</b>  |  |
| 8       | Yes       | <b>IPI00021885.1</b> | <b>Isoform 1 of Fibrinogen alpha chain</b>                  | <b>866</b>  | <b>6.33</b>   | <b>2.31</b>  | <b>47.67</b> | <b>10.69</b> | <b>11.33</b> | <b>4.93</b>  | <b>8.33</b>  | <b>4.73</b>  |  |
| 8       | No        | IPI00029717.1        | Isoform 2 of Fibrinogen alpha chain                         | 644         | 6.33          | 2.31         | 47.67        | 10.69        | 11.33        | 4.93         | 8.33         | 4.73         |  |
| 8       | No        | IPI00902755.1        | FGA protein (Fragment)                                      | 250         | 1.33          | 1.15         | 19.33        | 2.08         | 4.33         | 1.53         | 0.67         | 1.15         |  |
| 8       | No        | IPI00871469.1        | FGA protein                                                 | 289         | 1.00          | 1.00         | 17.67        | 2.52         | 4.00         | 1.73         | 0.33         | 0.58         |  |
| 9       | Yes       | <b>IPI00641737.1</b> | <b>Haptoglobin</b>                                          | <b>420</b>  | <b>12.67</b>  | <b>3.51</b>  | <b>40.33</b> | <b>12.86</b> |              |              |              |              |  |
| 9       | No        | IPI00478493.3        | haptoglobin isoform 2 preproprotein                         | 347         | 12.00         | 3.61         | 34.00        | 9.54         |              |              |              |              |  |
| 9       | No        | IPI00942787.1        | 42 kDa protein                                              | 382         | 12.00         | 3.00         | 34.00        | 8.72         |              |              |              |              |  |
| 9       | No        | IPI00431645.1        | HP protein                                                  | 281         | 10.00         | 3.46         | 25.00        | 7.94         |              |              |              |              |  |
| 10      | Yes       | <b>IPI00783987.2</b> | <b>Complement C3 (Fragment)</b>                             | <b>1663</b> | <b>10.00</b>  | <b>0.00</b>  | <b>40.00</b> | <b>2.00</b>  | <b>4.00</b>  | <b>1.00</b>  | <b>3.67</b>  | <b>2.08</b>  |  |
| 10      | No        | IPI00942927.1        | cDNA FLJ57339, highly similar to Complement C3              | 1098        | 10.00         | 0.00         | 34.00        | 3.61         | 4.00         | 1.00         | 3.33         | 2.31         |  |
| 10      | No        | IPI00887739.3        | similar to complement component C3, partial                 | 1295        | 8.00          | 1.00         | 32.67        | 2.31         | 4.00         | 1.00         | 3.33         | 2.31         |  |
| 10      | No        | IPI00739237.1        | similar to complement component 3                           | 390         | 2.00          | 1.00         | 6.67         | 1.53         |              |              | 0.33         | 0.58         |  |
| 11      | Yes       | <b>IPI00022229.1</b> | <b>Apolipoprotein B-100</b>                                 | <b>4563</b> |               |              | <b>4.00</b>  | <b>1.73</b>  | <b>13.33</b> | <b>4.04</b>  | <b>12.00</b> | <b>7.55</b>  |  |

|    |     |                      |                                                                                |             |              |             |              |             |              |              |              |              |
|----|-----|----------------------|--------------------------------------------------------------------------------|-------------|--------------|-------------|--------------|-------------|--------------|--------------|--------------|--------------|
| 12 | Yes | <b>IPI00022895.7</b> | <b>Alpha-1B-glycoprotein</b>                                                   | <b>495</b>  | <b>1.67</b>  | <b>2.08</b> | <b>11.00</b> | <b>3.00</b> | <b>23.33</b> | <b>10.69</b> | <b>24.33</b> | <b>5.77</b>  |
| 12 | No  | IPI00644018.1        | 41 kDa protein                                                                 | 373         | 1.00         | 1.73        | 8.00         | 1.73        | 17.00        | 7.21         | 19.67        | 4.73         |
| 12 | No  | IPI00646799.1        | cDNA FLJ31323 fis, clone LIVER2000037, highly similar to Alpha-1B-glycoprotein | 326         | 1.00         | 1.73        | 7.67         | 1.15        | 15.67        | 6.66         | 17.00        | 4.36         |
| 12 | No  | IPI00902880.1        | cDNA FLJ42722 fis, clone BRAMY4000277, highly similar to Alpha-1B-glycoprotein | 345         | 0.67         | 1.15        | 4.00         | 1.00        | 11.00        | 3.61         | 11.67        | 2.52         |
| 13 | Yes | <b>IPI00017601.1</b> | <b>Ceruloplasmin</b>                                                           | <b>1065</b> |              |             | <b>5.00</b>  | <b>5.29</b> | <b>17.33</b> | <b>4.73</b>  | <b>27.00</b> | <b>6.56</b>  |
| 13 | No  | IPI00946976.1        | Putative uncharacterized protein CP                                            | 188         |              |             | 1.00         | 0.00        | 3.67         | 1.53         | 6.33         | 2.52         |
| 14 | Yes | <b>IPI00304273.2</b> | <b>Apolipoprotein A-IV</b>                                                     | <b>396</b>  | <b>5.00</b>  | <b>2.00</b> | <b>16.67</b> | <b>1.15</b> | <b>33.67</b> | <b>5.86</b>  | <b>36.33</b> | <b>7.09</b>  |
| 15 | Yes | <b>IPI00947307.1</b> | <b>cDNA FLJ58075, highly similar to Ceruloplasmin</b>                          | <b>946</b>  |              |             | <b>4.67</b>  | <b>4.73</b> | <b>16.67</b> | <b>4.04</b>  | <b>26.33</b> | <b>5.03</b>  |
| 16 | Yes | <b>IPI00847179.1</b> | <b>apolipoprotein A-IV precursor</b>                                           | <b>396</b>  | <b>4.00</b>  | <b>2.00</b> | <b>15.67</b> | <b>1.15</b> | <b>33.33</b> | <b>6.43</b>  | <b>35.33</b> | <b>7.09</b>  |
| 17 | Yes | <b>IPI00019580.1</b> | <b>Plasminogen</b>                                                             | <b>810</b>  |              |             | <b>5.33</b>  | <b>1.15</b> | <b>12.67</b> | <b>6.66</b>  | <b>17.67</b> | <b>5.51</b>  |
| 17 | No  | IPI00025327.2        | plasminogen isoform 2 precursor                                                | 136         |              |             | 1.00         | 0.00        | 2.33         | 1.53         | 5.00         | 2.00         |
| 17 | No  | IPI00855913.1        | Plasminogen                                                                    | 166         |              |             | 1.00         | 0.00        | 2.33         | 1.53         | 5.00         | 2.00         |
| 18 | Yes | <b>IPI00218999.3</b> | <b>Putative uncharacterized protein CFH</b>                                    | <b>439</b>  | <b>1.67</b>  | <b>1.15</b> | <b>10.67</b> | <b>1.15</b> | <b>20.67</b> | <b>4.04</b>  | <b>29.33</b> | <b>14.50</b> |
| 18 | No  | IPI00515041.5        | Complement factor H                                                            | 385         | 1.67         | 1.15        | 9.33         | 2.31        | 15.67        | 1.53         | 24.33        | 13.01        |
| 19 | Yes | <b>IPI00215894.1</b> | <b>Isoform LMW of Kininogen-1</b>                                              | <b>427</b>  | <b>3.00</b>  | <b>1.00</b> | <b>8.67</b>  | <b>2.08</b> | <b>15.67</b> | <b>6.43</b>  | <b>25.67</b> | <b>3.21</b>  |
| 19 | No  | IPI00924859.1        | kininogen 1 isoform 3                                                          | 391         | 2.67         | 0.58        | 7.67         | 2.08        | 13.67        | 5.51         | 24.33        | 2.08         |
| 19 | No  | IPI00789376.1        | KNG1 protein                                                                   | 291         | 2.67         | 1.15        | 7.00         | 1.00        | 12.00        | 5.20         | 20.00        | 1.73         |
| 19 | No  | IPI00797833.4        | 21 kDa protein                                                                 | 189         | 0.33         | 0.58        | 1.67         | 1.15        | 3.67         | 1.53         | 5.67         | 1.53         |
| 20 | Yes | <b>IPI00021841.1</b> | <b>Apolipoprotein A-I</b>                                                      | <b>267</b>  | <b>12.33</b> | <b>2.52</b> | <b>28.67</b> | <b>7.37</b> |              |              |              |              |
| 20 | No  | IPI00853525.1        | Apolipoprotein A1                                                              | 245         | 12.33        | 2.52        | 28.67        | 7.37        |              |              |              |              |
| 21 | Yes | <b>IPI00032328.2</b> | <b>Isoform HMW of Kininogen-1</b>                                              | <b>644</b>  | <b>1.00</b>  | <b>1.00</b> | <b>7.67</b>  | <b>2.89</b> | <b>13.00</b> | <b>4.58</b>  | <b>17.67</b> | <b>3.51</b>  |
| 21 | No  | IPI00797175.1        | 20 kDa protein                                                                 | 175         | 0.33         | 0.58        | 1.33         | 1.53        | 1.00         | 1.00         | 0.33         | 0.58         |
| 22 | Yes | <b>IPI00305461.3</b> | <b>Inter-alpha-trypsin inhibitor heavy chain H2</b>                            | <b>946</b>  | <b>0.33</b>  | <b>0.58</b> | <b>7.00</b>  | <b>4.36</b> | <b>16.00</b> | <b>4.36</b>  | <b>24.33</b> | <b>6.03</b>  |
| 22 | No  | IPI00645038.1        | Inter-alpha (Globulin) inhibitor H2                                            | 935         | 0.33         | 0.58        | 7.00         | 4.36        | 16.00        | 4.36         | 24.33        | 6.03         |
| 22 | No  | IPI00910636.1        | cDNA FLJ53848, highly similar to Inter-alpha-trypsin inhibitor heavy chain H2  | 543         |              |             | 5.00         | 2.65        | 8.67         | 4.04         | 14.00        | 3.61         |
| 22 | No  | IPI00514159.1        | Inter-alpha (Globulin) inhibitor H2                                            | 237         | 0.33         | 0.58        | 2.00         | 1.73        | 7.33         | 1.15         | 10.33        | 4.73         |
| 23 | Yes | <b>IPI00896419.3</b> | <b>Isoform 1 of Inter-alpha-trypsin inhibitor heavy chain H4</b>               | <b>930</b>  | <b>1.00</b>  | <b>1.00</b> | <b>3.33</b>  | <b>1.15</b> | <b>10.33</b> | <b>5.86</b>  | <b>18.00</b> | <b>4.58</b>  |
| 24 | Yes | <b>IPI00026314.1</b> | <b>Isoform 1 of Gelsolin</b>                                                   | <b>782</b>  | <b>0.33</b>  | <b>0.58</b> | <b>1.00</b>  | <b>1.00</b> | <b>7.33</b>  | <b>5.51</b>  | <b>14.00</b> | <b>3.61</b>  |
| 24 | No  | IPI00646773.2        | Isoform 2 of Gelsolin                                                          | 731         | 0.33         | 0.58        | 1.00         | 1.00        | 7.33         | 5.51         | 14.00        | 3.61         |
| 24 | No  | IPI00647556.2        | gelsolin isoform c                                                             | 742         | 0.33         | 0.58        | 1.00         | 1.00        | 7.33         | 5.51         | 14.00        | 3.61         |
| 24 | No  | IPI00796316.4        | cDNA FLJ53327, highly similar to Gelsolin                                      | 705         | 0.33         | 0.58        | 1.00         | 1.00        | 7.33         | 5.51         | 14.00        | 3.61         |
| 25 | Yes | <b>IPI00022431.2</b> | <b>cDNA FLJ55606, highly similar to Alpha-2-HS-glycoprotein</b>                | <b>433</b>  | <b>2.00</b>  | <b>1.00</b> | <b>8.67</b>  | <b>2.89</b> | <b>16.67</b> | <b>4.62</b>  | <b>19.33</b> | <b>3.79</b>  |
| 25 | No  | IPI00953689.1        | Alpha-2-HS-glycoprotein                                                        | 367         | 2.00         | 1.00        | 8.67         | 2.89        | 16.67        | 4.62         | 19.33        | 3.79         |
| 25 | No  | IPI00795830.1        | 29 kDa protein                                                                 | 261         |              |             | 4.67         | 2.08        | 11.00        | 3.46         | 14.67        | 3.21         |
| 26 | Yes | <b>IPI00553177.1</b> | <b>Isoform 1 of Alpha-1-antitrypsin</b>                                        | <b>418</b>  | <b>2.33</b>  | <b>1.53</b> | <b>21.67</b> | <b>7.37</b> |              |              |              |              |
| 26 | No  | IPI00790784.2        | Isoform 2 of Alpha-1-antitrypsin                                               | 359         | 2.00         | 1.00        | 16.33        | 4.16        |              |              |              |              |

|           |            |                      |                                                                                                         |             |             |             |              |             |              |             |              |             |
|-----------|------------|----------------------|---------------------------------------------------------------------------------------------------------|-------------|-------------|-------------|--------------|-------------|--------------|-------------|--------------|-------------|
| 26        | No         | IPI00869004.1        | Isoform 3 of Alpha-1-antitrypsin                                                                        | 306         |             |             | 11.00        | 2.00        |              |             |              |             |
| 26        | No         | IPI00305457.5        | PRO2275                                                                                                 | 120         | 2.00        | 1.73        | 9.00         | 4.36        |              |             |              |             |
| <b>27</b> | <b>Yes</b> | <b>IPI00019568.1</b> | <b>Prothrombin (Fragment)</b>                                                                           | <b>622</b>  | <b>1.00</b> | <b>0.00</b> | <b>3.67</b>  | <b>2.08</b> | <b>10.67</b> | <b>2.89</b> | <b>16.33</b> | <b>4.04</b> |
| 27        | No         | IPI00877967.1        | Putative uncharacterized protein F2                                                                     | 324         | 1.00        | 0.00        | 2.00         | 1.00        | 3.00         | 0.00        | 6.00         | 2.00        |
| <b>28</b> | <b>Yes</b> | <b>IPI00292530.1</b> | <b>Inter-alpha-trypsin inhibitor heavy chain H1</b>                                                     | <b>911</b>  |             |             | <b>4.00</b>  | <b>2.65</b> | <b>8.67</b>  | <b>3.06</b> | <b>15.00</b> | <b>7.00</b> |
| 28        | No         | IPI00953675.1        | inter-alpha (globulin) inhibitor H1 isoform b                                                           | 769         |             |             | 2.33         | 1.15        | 5.00         | 2.00        | 11.33        | 6.03        |
| 28        | No         | IPI00877852.2        | inter-alpha (globulin) inhibitor H1 isoform c                                                           | 623         |             |             | 2.00         | 1.00        | 5.00         | 2.00        | 11.00        | 5.57        |
| 28        | No         | IPI00383338.1        | PRO2769                                                                                                 | 494         |             |             | 2.00         | 1.00        | 4.67         | 1.53        | 10.33        | 5.03        |
| 28        | No         | IPI00945924.1        | Putative uncharacterized protein ITIH1                                                                  | 213         |             |             | 1.67         | 1.53        | 3.67         | 1.15        | 3.67         | 1.15        |
| <b>29</b> | <b>Yes</b> | <b>IPI00414283.6</b> | <b>Isoform 9 of Fibronectin</b>                                                                         | <b>2240</b> | <b>1.00</b> | <b>1.00</b> | <b>3.33</b>  | <b>1.53</b> | <b>8.33</b>  | <b>1.53</b> | <b>14.67</b> | <b>8.02</b> |
| 29        | No         | IPI00845263.1        | fibronectin 1 isoform 2 preproprotein                                                                   | 2421        | 1.00        | 1.00        | 3.33         | 1.53        | 8.33         | 1.53        | 14.67        | 8.02        |
| <b>30</b> | <b>Yes</b> | <b>IPI00876888.1</b> | <b>cDNA FLJ78387</b>                                                                                    | <b>472</b>  | <b>8.00</b> | <b>1.73</b> | <b>23.00</b> | <b>7.21</b> |              |             |              |             |
| <b>31</b> | <b>Yes</b> | <b>IPI00794184.1</b> | <b>cDNA FLJ37971 fis, clone CTONG2009958, highly similar to CERULOPLASMIN</b>                           | <b>846</b>  |             |             | <b>3.00</b>  | <b>4.36</b> | <b>12.33</b> | <b>4.62</b> | <b>17.00</b> | <b>3.00</b> |
| 31        | No         | IPI00946417.1        | Putative uncharacterized protein CP                                                                     | 852         |             |             | 3.00         | 4.36        | 12.33        | 4.62        | 17.00        | 3.00        |
| <b>32</b> | <b>Yes</b> | <b>IPI00478003.2</b> | <b>Alpha-2-macroglobulin</b>                                                                            | <b>1474</b> | <b>3.33</b> | <b>2.08</b> | <b>15.67</b> | <b>7.64</b> |              |             |              |             |
| <b>33</b> | <b>Yes</b> | <b>IPI00384938.1</b> | <b>Putative uncharacterized protein DKFZp686N02209</b>                                                  | <b>482</b>  | <b>8.00</b> | <b>1.73</b> | <b>18.67</b> | <b>7.37</b> |              |             |              |             |
| <b>34</b> | <b>Yes</b> | <b>IPI00550731.2</b> | <b>Putative uncharacterized protein</b>                                                                 | <b>239</b>  | <b>4.00</b> | <b>3.00</b> | <b>14.33</b> | <b>2.08</b> |              |             |              |             |
| 34        | No         | IPI00939470.1        | 26 kDa protein                                                                                          | 240         | 4.00        | 3.00        | 13.67        | 1.53        |              |             |              |             |
| <b>35</b> | <b>Yes</b> | <b>IPI00940069.1</b> | <b>Ig kappa chain C region</b>                                                                          | <b>234</b>  | <b>4.33</b> | <b>3.51</b> | <b>14.00</b> | <b>2.00</b> |              |             |              |             |
| <b>36</b> | <b>Yes</b> | <b>IPI00386879.1</b> | <b>cDNA FLJ14473 fis, clone MAMMA1001080, highly similar to Homo sapiens SNC73 protein (SNC73) mRNA</b> | <b>494</b>  | <b>3.33</b> | <b>1.53</b> | <b>17.67</b> | <b>8.02</b> |              |             |              |             |
| 36        | No         | IPI00426060.3        | Putative uncharacterized protein DKFZp686J11235 (Fragment)                                              | 506         | 3.33        | 1.53        | 15.67        | 8.02        |              |             |              |             |
| 36        | No         | IPI00449920.1        | cDNA FLJ90170 fis, clone MAMMA1000370, highly similar to Ig alpha-1 chain C region                      | 493         | 3.33        | 1.53        | 15.67        | 8.02        |              |             |              |             |
| <b>37</b> | <b>Yes</b> | <b>IPI00022488.1</b> | <b>Hemopexin</b>                                                                                        | <b>462</b>  |             |             | <b>7.33</b>  | <b>1.53</b> | <b>18.33</b> | <b>6.51</b> | <b>23.33</b> | <b>6.03</b> |
| <b>38</b> | <b>Yes</b> | <b>IPI00894122.1</b> | <b>Putative uncharacterized protein APOB</b>                                                            | <b>828</b>  |             |             | <b>1.00</b>  | <b>1.00</b> | <b>7.67</b>  | <b>2.31</b> | <b>8.00</b>  | <b>4.58</b> |
| <b>39</b> | <b>Yes</b> | <b>IPI00291262.3</b> | <b>Isoform 1 of Clusterin</b>                                                                           | <b>449</b>  | <b>0.33</b> | <b>0.58</b> | <b>3.33</b>  | <b>2.31</b> | <b>11.33</b> | <b>3.21</b> | <b>11.00</b> | <b>3.00</b> |
| 39        | No         | IPI00400826.1        | Isoform 2 of Clusterin                                                                                  | 501         | 0.33        | 0.58        | 3.33         | 2.31        | 11.33        | 3.21        | 11.00        | 3.00        |
| 39        | No         | IPI00795633.1        | CLU                                                                                                     | 448         | 0.33        | 0.58        | 3.33         | 2.31        | 11.33        | 3.21        | 11.00        | 3.00        |
| 39        | No         | IPI00793848.1        | 54 kDa protein                                                                                          | 466         | 0.33        | 0.58        | 2.00         | 2.00        | 7.00         | 2.65        | 8.00         | 2.65        |
| <b>40</b> | <b>Yes</b> | <b>IPI00032179.3</b> | <b>Antithrombin-III</b>                                                                                 | <b>464</b>  | <b>0.67</b> | <b>0.58</b> | <b>2.67</b>  | <b>0.58</b> | <b>12.00</b> | <b>7.21</b> | <b>19.67</b> | <b>2.08</b> |
| 40        | No         | IPI00844156.2        | SERPINC1 protein                                                                                        | 259         | 0.67        | 0.58        | 2.33         | 0.58        | 10.00        | 6.56        | 14.33        | 2.89        |
| <b>41</b> | <b>Yes</b> | <b>IPI00298828.3</b> | <b>Beta-2-glycoprotein 1</b>                                                                            | <b>345</b>  | <b>2.00</b> | <b>1.00</b> | <b>3.67</b>  | <b>2.52</b> | <b>8.33</b>  | <b>5.13</b> | <b>16.67</b> | <b>4.16</b> |
| 41        | No         | IPI00910625.1        | cDNA FLJ51265, moderately similar to Beta-2-glycoprotein 1                                              | 274         | 2.00        | 1.00        | 3.67         | 2.52        | 8.33         | 5.13        | 16.33        | 4.04        |



|    |     |               |                                                                                   |     |      |      |       |      |       |      |       |      |  |
|----|-----|---------------|-----------------------------------------------------------------------------------|-----|------|------|-------|------|-------|------|-------|------|--|
| 42 | Yes | IPI00399007.7 | Putative uncharacterized protein DKFZp686I04196 (Fragment)                        | 417 | 5.33 | 0.58 | 16.33 | 4.16 |       |      |       |      |  |
| 42 | No  | IPI00930072.1 | Putative uncharacterized protein DKFZp686E23209                                   | 470 | 4.00 | 0.00 | 12.67 | 0.58 |       |      |       |      |  |
| 43 | Yes | IPI00426051.3 | Putative uncharacterized protein DKFZp686C15213                                   | 464 | 4.67 | 0.58 | 17.33 | 4.16 |       |      |       |      |  |
| 44 | Yes | IPI00298497.3 | Fibrinogen beta chain                                                             | 491 | 3.00 | 1.00 | 16.00 | 6.24 | 4.00  | 1.00 | 1.33  | 1.53 |  |
| 44 | No  | IPI00816687.1 | FGB protein (Fragment)                                                            | 173 | 1.00 | 1.00 | 5.33  | 0.58 | 1.67  | 0.58 | 0.33  | 0.58 |  |
| 45 | Yes | IPI00944677.1 | IGL@ protein                                                                      | 233 | 3.67 | 1.15 | 9.00  | 3.00 |       |      |       |      |  |
| 46 | Yes | IPI00887169.2 | Putative uncharacterized protein                                                  | 236 | 3.67 | 0.58 | 9.33  | 2.31 |       |      |       |      |  |
| 47 | Yes | IPI00658130.1 | IGL@ protein                                                                      | 236 | 4.00 | 1.00 | 10.00 | 1.73 |       |      |       |      |  |
| 47 | No  | IPI00784935.1 | IGL@ protein                                                                      | 234 | 4.00 | 1.00 | 10.00 | 1.73 |       |      |       |      |  |
| 48 | Yes | IPI00219713.1 | Isoform Gamma-A of Fibrinogen gamma chain                                         | 437 | 0.67 | 0.58 | 11.67 | 3.79 | 3.33  | 1.53 |       |      |  |
| 48 | No  | IPI00877792.1 | Putative uncharacterized protein FGG                                              | 445 | 0.67 | 0.58 | 11.67 | 3.79 | 3.33  | 1.53 |       |      |  |
| 48 | No  | IPI00021891.5 | Isoform Gamma-B of Fibrinogen gamma chain                                         | 453 | 0.67 | 0.58 | 10.67 | 3.79 | 2.67  | 1.15 |       |      |  |
| 48 | No  | IPI00877703.1 | Putative uncharacterized protein FGG                                              | 461 | 0.67 | 0.58 | 10.67 | 3.79 | 2.67  | 1.15 |       |      |  |
| 49 | Yes | IPI00298971.1 | Vitronectin                                                                       | 478 | 2.00 | 1.00 | 2.67  | 0.58 | 10.00 | 3.61 | 11.67 | 2.52 |  |
| 50 | Yes | IPI00879709.3 | Complement component 6 precursor                                                  | 943 |      |      | 0.33  | 0.58 | 2.33  | 2.52 | 3.67  | 2.31 |  |
| 51 | Yes | IPI00941961.1 | 66 kDa protein                                                                    | 599 | 3.67 | 1.53 | 8.33  | 1.53 |       |      |       |      |  |
| 51 | No  | IPI00952640.1 | Isoform 1 of Ig mu chain C region                                                 | 452 | 3.67 | 1.53 | 8.33  | 1.53 |       |      |       |      |  |
| 51 | No  | IPI00479708.6 | Full-length cDNA clone CS0DD006YL02 of Neuroblastoma of Homo sapiens              | 375 | 3.67 | 1.53 | 7.67  | 1.53 |       |      |       |      |  |
| 51 | No  | IPI00385264.1 | Ig mu heavy chain disease protein                                                 | 391 | 1.67 | 0.58 | 5.00  | 1.00 |       |      |       |      |  |
| 52 | Yes | IPI00022420.3 | Retinol-binding protein 4                                                         | 201 | 1.00 | 1.00 | 4.67  | 1.53 | 6.33  | 2.52 | 14.00 | 3.61 |  |
| 52 | No  | IPI00480192.1 | Retinol binding protein 4, plasma                                                 | 199 | 1.00 | 1.00 | 4.67  | 1.53 | 6.33  | 2.52 | 14.00 | 3.61 |  |
| 52 | No  | IPI00844536.2 | Retinol binding protein 4, plasma, isoform CRA_b                                  | 199 | 1.00 | 1.00 | 4.67  | 1.53 | 6.33  | 2.52 | 14.00 | 3.61 |  |
| 53 | Yes | IPI00939270.1 | 25 kDa protein                                                                    | 233 | 4.33 | 0.58 | 6.67  | 3.06 |       |      |       |      |  |
| 53 | No  | IPI00941543.1 | 25 kDa protein                                                                    | 232 | 4.33 | 0.58 | 6.67  | 3.06 |       |      |       |      |  |
| 54 | Yes | IPI00930442.1 | Putative uncharacterized protein DKFZp686M24218                                   | 476 | 3.67 | 0.58 | 10.33 | 3.21 |       |      |       |      |  |
| 55 | Yes | IPI00829640.1 | IGL@ protein                                                                      | 233 | 3.67 | 0.58 | 7.00  | 3.00 |       |      |       |      |  |
| 56 | Yes | IPI00829877.1 | IGL@ protein                                                                      | 232 | 3.67 | 0.58 | 9.00  | 1.00 |       |      |       |      |  |
| 57 | Yes | IPI00019943.1 | Afamin                                                                            | 599 |      |      |       |      | 3.67  | 2.31 | 14.33 | 3.21 |  |
| 58 | Yes | IPI00550991.3 | cDNA FLJ35730 fis, clone TESTI2003131, highly similar to ALPHA-1-ANTICHYMOTRYPSIN | 448 | 0.67 | 0.58 | 1.00  | 0.00 | 3.67  | 2.08 | 5.00  | 1.00 |  |
| 58 | No  | IPI00847635.1 | Isoform 1 of Alpha-1-antichymotrypsin                                             | 423 | 0.67 | 0.58 | 1.00  | 0.00 | 3.67  | 2.08 | 5.00  | 1.00 |  |
| 59 | Yes | IPI00291867.3 | Complement factor I                                                               | 583 |      |      | 0.33  | 0.58 | 4.67  | 2.52 | 10.67 | 1.15 |  |
| 59 | No  | IPI00935408.1 | CFI protein                                                                       | 377 |      |      | 0.33  | 0.58 | 4.67  | 2.52 | 9.00  | 2.00 |  |
| 59 | No  | IPI00796990.3 | cDNA FLJ58124, highly similar to Complement factor I                              | 591 |      |      | 0.33  | 0.58 | 4.33  | 2.08 | 9.00  | 1.00 |  |
| 60 | Yes | IPI00220327.4 | Keratin, type II cytoskeletal 1                                                   | 644 |      |      | 0.67  | 0.58 |       |      |       |      |  |
| 61 | Yes | IPI00163207.1 | Isoform 1 of N-acetylmuramoyl-L-alanine amidase                                   | 576 |      |      | 1.33  | 1.15 | 4.33  | 1.53 | 6.33  | 3.79 |  |

|    |     |                      |                                                                         |             |             |             |             |             |             |             |              |             |
|----|-----|----------------------|-------------------------------------------------------------------------|-------------|-------------|-------------|-------------|-------------|-------------|-------------|--------------|-------------|
| 61 | No  | IPI00394992.1        | Isoform 2 of N-acetylmuramoyl-L-alanine amidase                         | 634         |             |             | 1.33        | 1.15        | 4.33        | 1.53        | 6.33         | 3.79        |
| 62 | Yes | <b>IPI00011264.2</b> | <b>Complement factor H-related protein 1</b>                            | <b>330</b>  |             |             | <b>1.67</b> | <b>1.53</b> | <b>4.67</b> | <b>2.52</b> | <b>7.00</b>  | <b>5.29</b> |
| 62 | No  | IPI00883722.1        | Complement factor H-related 1                                           | 271         |             |             | 0.33        | 0.58        | 3.00        | 1.73        | 3.33         | 2.89        |
| 65 | Yes | <b>IPI00011252.1</b> | <b>Complement component C8 alpha chain</b>                              | <b>584</b>  |             |             |             |             | <b>2.00</b> | <b>1.00</b> | <b>6.33</b>  | <b>2.08</b> |
| 66 | Yes | <b>IPI00022426.1</b> | <b>Protein AMBP</b>                                                     | <b>352</b>  | <b>0.33</b> | <b>0.58</b> | <b>1.67</b> | <b>1.15</b> | <b>8.33</b> | <b>2.08</b> | <b>10.67</b> | <b>2.08</b> |
| 66 | No  | IPI00922298.1        | cDNA FLJ51445, highly similar to AMBP protein                           | 270         |             |             |             |             | 2.00        | 0.00        | 2.00         | 1.00        |
| 67 | Yes | <b>IPI00006114.4</b> | <b>Pigment epithelium-derived factor</b>                                | <b>418</b>  |             |             |             |             | <b>3.00</b> | <b>1.73</b> | <b>3.67</b>  | <b>2.08</b> |
| 67 | No  | IPI00796279.1        | 25 kDa protein                                                          | 216         |             |             |             |             | 1.00        | 0.00        | 2.00         | 0.00        |
| 68 | Yes | <b>IPI00028413.8</b> | <b>Isoform 1 of Inter-alpha-trypsin inhibitor heavy chain H3</b>        | <b>890</b>  |             |             |             |             | <b>2.33</b> | <b>4.04</b> | <b>2.33</b>  | <b>2.52</b> |
| 68 | No  | IPI00873416.2        | Putative uncharacterized protein ITIH3                                  | 887         |             |             |             |             | 2.33        | 4.04        | 2.33         | 2.52        |
| 68 | No  | IPI00876950.1        | Isoform 2 of Inter-alpha-trypsin inhibitor heavy chain H3               | 886         |             |             |             |             | 2.33        | 4.04        | 2.33         | 2.52        |
| 68 | No  | IPI00953573.1        | Putative uncharacterized protein ITIH3                                  | 885         |             |             |             |             | 2.33        | 4.04        | 2.33         | 2.52        |
| 69 | Yes | <b>IPI00022395.1</b> | <b>Complement component C9</b>                                          | <b>559</b>  |             |             |             |             | <b>3.67</b> | <b>0.58</b> | <b>5.33</b>  | <b>1.53</b> |
| 71 | Yes | <b>IPI00032291.2</b> | <b>Complement C5</b>                                                    | <b>1676</b> |             |             | <b>0.33</b> | <b>0.58</b> | <b>4.00</b> | <b>1.00</b> | <b>7.00</b>  | <b>2.65</b> |
| 71 | No  | IPI00816741.1        | Complement component 5 variant (Fragment)                               | 1106        |             |             | 0.33        | 0.58        | 3.33        | 0.58        | 5.67         | 2.08        |
| 72 | Yes | <b>IPI00830047.1</b> | <b>Putative uncharacterized protein ENSP00000374858 (Fragment)</b>      | <b>106</b>  | <b>2.00</b> | <b>0.00</b> | <b>4.33</b> | <b>0.58</b> |             |             |              |             |
| 73 | Yes | <b>IPI00017696.1</b> | <b>Complement C1s subcomponent</b>                                      | <b>688</b>  |             |             | <b>0.33</b> | <b>0.58</b> | <b>4.00</b> | <b>2.65</b> | <b>7.33</b>  | <b>2.08</b> |
| 73 | No  | IPI00749179.2        | Putative uncharacterized protein C1S                                    | 682         |             |             | 0.33        | 0.58        | 4.00        | 2.65        | 7.33         | 2.08        |
| 73 | No  | IPI00790679.1        | 21 kDa protein                                                          | 186         |             |             |             |             | 0.67        | 1.15        | 2.00         | 1.00        |
| 76 | Yes | <b>IPI00654888.4</b> | <b>Plasma kallikrein</b>                                                | <b>638</b>  |             |             | <b>1.33</b> | <b>0.58</b> | <b>1.00</b> | <b>1.00</b> | <b>4.33</b>  | <b>0.58</b> |
| 76 | No  | IPI00879984.6        | cDNA FLJ51250, highly similar to Plasma kallikrein                      | 514         |             |             | 0.67        | 0.58        | 0.67        | 0.58        | 3.67         | 1.15        |
| 79 | Yes | <b>IPI00031101.1</b> | <b>Natriuretic peptides B</b>                                           | <b>134</b>  |             |             |             |             |             |             | <b>2.33</b>  | <b>2.08</b> |
| 80 | Yes | <b>IPI00218732.3</b> | <b>Serum paraoxonase/arylesterase 1</b>                                 | <b>355</b>  |             |             |             |             | <b>2.33</b> | <b>0.58</b> | <b>2.67</b>  | <b>1.15</b> |
| 80 | No  | IPI00916980.1        | Putative uncharacterized protein PON1                                   | 77          |             |             |             |             | 2.00        | 1.00        | 1.67         | 1.53        |
| 81 | Yes | <b>IPI00020986.2</b> | <b>Lumican</b>                                                          | <b>338</b>  |             |             | <b>1.00</b> | <b>0.00</b> | <b>5.00</b> | <b>2.00</b> | <b>5.67</b>  | <b>0.58</b> |
| 81 | No  | IPI00794403.1        | 23 kDa protein                                                          | 202         |             |             | 1.00        | 0.00        | 4.67        | 1.53        | 4.33         | 1.53        |
| 82 | Yes | <b>IPI00022417.4</b> | <b>Leucine-rich alpha-2-glycoprotein</b>                                | <b>347</b>  |             |             |             |             | <b>3.67</b> | <b>0.58</b> | <b>1.33</b>  | <b>1.15</b> |
| 83 | Yes | <b>IPI00019581.1</b> | <b>Coagulation factor XII</b>                                           | <b>615</b>  |             |             |             |             | <b>3.67</b> | <b>1.53</b> | <b>5.00</b>  | <b>0.00</b> |
| 84 | Yes | <b>IPI00021842.1</b> | <b>Apolipoprotein E</b>                                                 | <b>317</b>  | <b>0.33</b> | <b>0.58</b> | <b>4.33</b> | <b>2.08</b> | <b>1.00</b> | <b>0.00</b> | <b>2.00</b>  | <b>1.73</b> |
| 84 | No  | IPI00878953.1        | MRNA for apolipoprotein E                                               | 288         |             |             | 3.00        | 1.00        | 1.00        | 0.00        | 0.67         | 0.58        |
| 84 | No  | IPI00879368.1        | Apolipoprotein E                                                        | 216         |             |             | 3.00        | 1.00        | 0.67        | 0.58        | 0.67         | 0.58        |
| 84 | No  | IPI00879456.1        | 25 kDa protein                                                          | 219         |             |             | 3.00        | 1.00        | 0.67        | 0.58        | 0.67         | 0.58        |
| 85 | Yes | <b>IPI00292950.4</b> | <b>Serpin peptidase inhibitor, clade D (Heparin cofactor), member 1</b> | <b>527</b>  |             |             | <b>0.67</b> | <b>1.15</b> | <b>3.00</b> | <b>1.00</b> | <b>4.33</b>  | <b>0.58</b> |
| 85 | No  | IPI00879573.1        | Heparin cofactor 2                                                      | 499         |             |             | 0.67        | 1.15        | 3.00        | 1.00        | 4.33         | 0.58        |
| 86 | Yes | <b>IPI00032220.3</b> | <b>Angiotensinogen</b>                                                  | <b>485</b>  |             |             | <b>0.67</b> | <b>0.58</b> | <b>1.33</b> | <b>0.58</b> | <b>3.67</b>  | <b>2.08</b> |



|            |            |                      |                                                                     |            |             |             |             |             |             |             |             |             |
|------------|------------|----------------------|---------------------------------------------------------------------|------------|-------------|-------------|-------------|-------------|-------------|-------------|-------------|-------------|
| 86         | No         | IPI00908365.1        | cDNA FLJ52255, highly similar to Angiotensinogen                    | 403        |             |             | 0.67        | 0.58        | 1.33        | 0.58        | 3.33        | 2.31        |
| <b>87</b>  | <b>Yes</b> | <b>IPI00296608.6</b> | <b>Complement component C7</b>                                      | <b>843</b> |             |             |             |             | <b>0.67</b> | <b>0.58</b> | <b>3.00</b> | <b>2.00</b> |
| 87         | No         | IPI00909594.1        | cDNA FLJ58413, highly similar to Complement component C7            | 486        |             |             |             |             |             |             | 1.00        | 0.00        |
| <b>88</b>  | <b>Yes</b> | <b>IPI00022371.1</b> | <b>Histidine-rich glycoprotein</b>                                  | <b>525</b> |             |             | <b>3.33</b> | <b>1.53</b> | <b>4.67</b> | <b>4.04</b> |             |             |
| <b>90</b>  | <b>Yes</b> | <b>IPI00006154.1</b> | <b>Isoform Long of Complement factor H-related protein 2</b>        | <b>270</b> |             |             |             |             | <b>0.67</b> | <b>0.58</b> | <b>3.67</b> | <b>2.31</b> |
| 90         | No         | IPI00218949.1        | Isoform Short of Complement factor H-related protein 2              | 243        |             |             |             |             | 0.67        | 0.58        | 3.67        | 2.31        |
| <b>91</b>  | <b>Yes</b> | <b>IPI00387118.1</b> | <b>Ig kappa chain V-III region WOL</b>                              | <b>109</b> | <b>1.00</b> | <b>1.00</b> | <b>4.33</b> | <b>0.58</b> |             |             |             |             |
| 91         | No         | IPI00030205.3        | Ig kappa chain V-III region HAH                                     | 129        | 1.00        | 1.00        | 3.00        | 1.00        |             |             |             |             |
| <b>93</b>  | <b>Yes</b> | <b>IPI00021727.1</b> | <b>C4b-binding protein alpha chain</b>                              | <b>597</b> |             |             | <b>2.33</b> | <b>0.58</b> | <b>1.33</b> | <b>1.53</b> |             |             |
| 93         | No         | IPI00872510.1        | Putative uncharacterized protein C4BPA                              | 408        |             |             | 1.33        | 1.15        | 0.67        | 0.58        |             |             |
| <b>94</b>  | <b>Yes</b> | <b>IPI00021854.1</b> | <b>Apolipoprotein A-II</b>                                          | <b>100</b> | <b>2.67</b> | <b>1.15</b> | <b>7.00</b> | <b>2.65</b> | <b>0.67</b> | <b>0.58</b> | <b>0.33</b> | <b>0.58</b> |
| <b>95</b>  | <b>Yes</b> | <b>IPI00387115.1</b> | <b>Ig kappa chain V-III region SIE</b>                              | <b>109</b> |             |             | <b>2.00</b> | <b>1.00</b> |             |             |             |             |
| <b>96</b>  | <b>Yes</b> | <b>IPI00166729.4</b> | <b>alpha-2-glycoprotein 1, zinc precursor</b>                       | <b>298</b> |             |             |             |             | <b>1.00</b> | <b>1.00</b> |             |             |
| 96         | No         | IPI00924948.1        | Putative uncharacterized protein AZGP1                              | 227        |             |             |             |             | 1.00        | 1.00        |             |             |
| <b>97</b>  | <b>Yes</b> | <b>IPI00021364.1</b> | <b>Properdin</b>                                                    | <b>469</b> |             |             |             |             | <b>2.33</b> | <b>0.58</b> | <b>1.67</b> | <b>1.53</b> |
| 97         | No         | IPI00946489.1        | Complement factor properdin, isoform CRA_c                          | 415        |             |             |             |             | 2.33        | 0.58        | 1.67        | 1.53        |
| 97         | No         | IPI00946166.1        | Putative uncharacterized protein CFP                                | 167        |             |             |             |             | 1.67        | 0.58        | 1.00        | 1.00        |
| <b>98</b>  | <b>Yes</b> | <b>IPI00303963.1</b> | <b>Complement C2 (Fragment)</b>                                     | <b>752</b> |             |             | <b>0.33</b> | <b>0.58</b> | <b>2.67</b> | <b>0.58</b> | <b>2.67</b> | <b>1.53</b> |
| <b>99</b>  | <b>Yes</b> | <b>IPI00003351.2</b> | <b>Isoform 1 of Extracellular matrix protein 1</b>                  | <b>540</b> |             |             |             |             | <b>0.67</b> | <b>1.15</b> | <b>2.00</b> | <b>1.73</b> |
| 99         | No         | IPI00645849.1        | Isoform 4 of Extracellular matrix protein 1                         | 567        |             |             |             |             | 0.67        | 1.15        | 2.00        | 1.73        |
| <b>100</b> | <b>Yes</b> | <b>IPI00294395.1</b> | <b>Complement component C8 beta chain</b>                           | <b>591</b> |             |             |             |             | <b>0.33</b> | <b>0.58</b> | <b>2.67</b> | <b>1.15</b> |
| <b>101</b> | <b>Yes</b> | <b>IPI00178926.2</b> | <b>Immunoglobulin J chain</b>                                       | <b>159</b> | <b>1.00</b> | <b>1.00</b> | <b>3.00</b> | <b>1.00</b> |             |             |             |             |
| 101        | No         | IPI00947235.1        | Putative uncharacterized protein IGJ                                | 70         | 1.00        | 1.00        | 2.00        | 0.00        |             |             |             |             |
| <b>102</b> | <b>Yes</b> | <b>IPI00296165.6</b> | <b>cDNA FLJ54471, highly similar to Complement C1r subcomponent</b> | <b>719</b> |             |             |             |             | <b>2.33</b> | <b>1.15</b> | <b>1.33</b> | <b>0.58</b> |
| 102        | No         | IPI00923551.1        | cDNA FLJ54318, highly similar to Complement C1r subcomponent        | 599        |             |             |             |             | 2.33        | 1.15        | 1.33        | 0.58        |
| 102        | No         | IPI00941440.1        | Putative uncharacterized protein C1R (Fragment)                     | 279        |             |             |             |             | 1.67        | 0.58        | 1.00        | 0.00        |
| <b>103</b> | <b>Yes</b> | <b>IPI00022429.3</b> | <b>Alpha-1-acid glycoprotein 1</b>                                  | <b>201</b> | <b>0.67</b> | <b>0.58</b> | <b>7.33</b> | <b>1.15</b> |             |             |             |             |
| 103        | No         | IPI00884926.1        | orosomuroid 1 precursor                                             | 201        | 0.67        | 0.58        | 7.33        | 1.15        |             |             |             |             |
| <b>104</b> | <b>Yes</b> | <b>IPI00011261.2</b> | <b>Complement component C8 gamma chain</b>                          | <b>202</b> |             |             |             |             | <b>1.00</b> | <b>0.00</b> | <b>1.33</b> | <b>0.58</b> |
| <b>105</b> | <b>Yes</b> | <b>IPI00006662.1</b> | <b>Apolipoprotein D</b>                                             | <b>189</b> |             |             | <b>1.00</b> | <b>1.00</b> |             |             |             |             |
| 105        | No         | IPI00924574.1        | Putative uncharacterized protein APOD                               | 215        |             |             | 1.00        | 1.00        |             |             |             |             |
| <b>106</b> | <b>Yes</b> | <b>IPI00029863.4</b> | <b>55 kDa protein</b>                                               | <b>495</b> |             |             |             |             | <b>1.00</b> | <b>1.00</b> | <b>1.33</b> | <b>1.53</b> |
| 106        | No         | IPI00879231.1        | Alpha-2-antiplasmin                                                 | 491        |             |             |             |             | 1.00        | 1.00        | 1.33        | 1.53        |

|            |            |                      |                                                                               |            |             |             |             |             |             |             |             |             |
|------------|------------|----------------------|-------------------------------------------------------------------------------|------------|-------------|-------------|-------------|-------------|-------------|-------------|-------------|-------------|
| 106        | No         | IPI00879608.2        | alpha-2-antiplasmin isoform b precursor                                       | 427        |             |             |             |             |             |             | 1.33        | 1.53        |
| <b>107</b> | <b>Yes</b> | <b>IPI00021857.1</b> | <b>Apolipoprotein C-III</b>                                                   | <b>99</b>  | <b>1.33</b> | <b>0.58</b> | <b>3.00</b> | <b>1.00</b> | <b>2.00</b> | <b>1.00</b> | <b>1.33</b> | <b>1.53</b> |
| 107        | No         | IPI00657670.1        | Apolipoprotein C-III variant 1                                                | 117        | 1.33        | 0.58        | 3.00        | 1.00        | 2.00        | 1.00        | 1.33        | 1.53        |
| <b>108</b> | <b>Yes</b> | <b>IPI00294004.1</b> | <b>Vitamin K-dependent protein S</b>                                          | <b>676</b> |             |             | <b>1.33</b> | <b>1.15</b> | <b>0.67</b> | <b>1.15</b> | <b>0.67</b> | <b>1.15</b> |
| 108        | No         | IPI00878131.1        | cDNA FLJ56936, highly similar to Vitamin K-dependent protein S                | 545        |             |             | 1.00        | 1.00        | 0.33        | 0.58        | 0.67        | 1.15        |
| 108        | No         | IPI00795619.1        | PROS1 protein                                                                 | 367        |             |             | 0.33        | 0.58        | 0.33        | 0.58        | 0.33        | 0.58        |
| <b>109</b> | <b>Yes</b> | <b>IPI00296534.2</b> | <b>Isoform D of Fibulin-1</b>                                                 | <b>703</b> |             |             |             |             |             |             | <b>2.00</b> | <b>0.00</b> |
| <b>110</b> | <b>Yes</b> | <b>IPI00025204.1</b> | <b>CD5 antigen-like</b>                                                       | <b>347</b> | <b>0.33</b> | <b>0.58</b> | <b>2.00</b> | <b>2.00</b> |             |             |             |             |
| <b>111</b> | <b>Yes</b> | <b>IPI00746623.2</b> | <b>Hyaluronan-binding protein 2</b>                                           | <b>560</b> |             |             |             |             | <b>1.00</b> | <b>1.00</b> | <b>1.67</b> | <b>1.53</b> |
| <b>112</b> | <b>Yes</b> | <b>IPI00019576.1</b> | <b>Coagulation factor X</b>                                                   | <b>488</b> |             |             |             |             | <b>0.33</b> | <b>0.58</b> | <b>1.00</b> | <b>1.73</b> |
| <b>113</b> | <b>Yes</b> | <b>IPI00387120.1</b> | <b>Ig kappa chain V-IV region Len</b>                                         | <b>114</b> |             |             | <b>1.00</b> | <b>1.00</b> |             |             |             |             |
| <b>114</b> | <b>Yes</b> | <b>IPI00736885.1</b> | <b>Ig kappa chain V-II region TEW</b>                                         | <b>113</b> |             |             | <b>0.67</b> | <b>1.15</b> |             |             |             |             |
| 114        | No         | IPI00827773.1        | Cold agglutinin FS-1 L-chain (Fragment)                                       | 113        |             |             | 0.67        | 1.15        |             |             |             |             |
| <b>116</b> | <b>Yes</b> | <b>IPI00296537.4</b> | <b>Isoform C of Fibulin-1</b>                                                 | <b>683</b> |             |             |             |             |             |             | <b>1.67</b> | <b>0.58</b> |
| 116        | No         | IPI00889740.1        | Fibulin 1                                                                     | 721        |             |             |             |             |             |             | 1.67        | 0.58        |
| <b>117</b> | <b>Yes</b> | <b>IPI00018305.4</b> | <b>Insulin-like growth factor-binding protein 3</b>                           | <b>291</b> |             |             |             |             |             |             | <b>2.33</b> | <b>1.15</b> |
| 117        | No         | IPI00556155.2        | insulin-like growth factor binding protein 3 isoform a precursor              | 297        |             |             |             |             |             |             | 2.33        | 1.15        |
| 117        | No         | IPI00903293.2        | cDNA FLJ52568, highly similar to Insulin-like growth factor-binding protein 3 | 276        |             |             |             |             |             |             | 2.33        | 1.15        |
| <b>118</b> | <b>Yes</b> | <b>IPI00890703.1</b> | <b>Cryocryoglobulin CC1 kappa light chain variable region (Fragment)</b>      | <b>107</b> |             |             | <b>1.00</b> | <b>0.00</b> |             |             |             |             |
| <b>120</b> | <b>Yes</b> | <b>IPI00186903.4</b> | <b>Isoform 2 of Apolipoprotein L1</b>                                         | <b>414</b> |             |             | <b>1.67</b> | <b>0.58</b> |             |             |             |             |
| 120        | No         | IPI00514475.5        | Isoform 1 of Apolipoprotein L1                                                | 398        |             |             | 1.67        | 0.58        |             |             |             |             |
| 120        | No         | IPI00914948.1        | apolipoprotein L1 isoform c precursor                                         | 380        |             |             | 1.67        | 0.58        |             |             |             |             |
| <b>121</b> | <b>Yes</b> | <b>IPI00748998.1</b> | <b>Single-chain Fv (Fragment)</b>                                             | <b>240</b> |             |             | <b>1.33</b> | <b>1.53</b> |             |             |             |             |
| <b>122</b> | <b>Yes</b> | <b>IPI00477992.1</b> | <b>complement component 1, q subcomponent, B chain precursor</b>              | <b>253</b> |             |             | <b>0.33</b> | <b>0.58</b> | <b>1.33</b> | <b>1.15</b> | <b>2.00</b> | <b>1.00</b> |
| 122        | No         | IPI00643948.2        | Complement component 1, q subcomponent, B chain                               | 231        |             |             | 0.33        | 0.58        | 1.33        | 1.15        | 2.00        | 1.00        |
| <b>123</b> | <b>Yes</b> | <b>IPI00022391.1</b> | <b>Serum amyloid P-component</b>                                              | <b>223</b> |             |             |             |             | <b>0.33</b> | <b>0.58</b> | <b>1.00</b> | <b>0.00</b> |
| <b>124</b> | <b>Yes</b> | <b>IPI00382436.1</b> | <b>Ig lambda chain V-III region SH</b>                                        | <b>108</b> | <b>0.33</b> | <b>0.58</b> | <b>0.67</b> | <b>0.58</b> |             |             |             |             |
| <b>125</b> | <b>Yes</b> | <b>IPI00022394.2</b> | <b>Complement C1q subcomponent subunit C</b>                                  | <b>245</b> |             |             |             |             | <b>2.33</b> | <b>0.58</b> | <b>2.00</b> | <b>1.00</b> |
| <b>126</b> | <b>Yes</b> | <b>IPI00410714.5</b> | <b>Hemoglobin subunit alpha</b>                                               | <b>142</b> |             |             | <b>0.67</b> | <b>0.58</b> |             |             |             |             |
| <b>127</b> | <b>Yes</b> | <b>IPI00783024.1</b> | <b>Myosin-reactive immunoglobulin heavy chain variable region (Fragment)</b>  | <b>131</b> |             |             | <b>2.33</b> | <b>0.58</b> |             |             |             |             |
| <b>128</b> | <b>Yes</b> | <b>IPI00019399.1</b> | <b>Serum amyloid A-4 protein</b>                                              | <b>130</b> | <b>0.33</b> | <b>0.58</b> | <b>2.00</b> | <b>0.00</b> |             |             |             |             |
| <b>129</b> | <b>Yes</b> | <b>IPI00915820.1</b> | <b>Anti-folate binding protein (Fragment)</b>                                 | <b>120</b> |             |             | <b>2.00</b> | <b>0.00</b> |             |             |             |             |
| <b>130</b> | <b>Yes</b> | <b>IPI00009028.1</b> | <b>Tetranectin</b>                                                            | <b>202</b> |             |             |             |             | <b>1.67</b> | <b>0.58</b> | <b>2.33</b> | <b>0.58</b> |

|     |     |                      |                                                                              |             |             |             |             |             |             |             |             |             |
|-----|-----|----------------------|------------------------------------------------------------------------------|-------------|-------------|-------------|-------------|-------------|-------------|-------------|-------------|-------------|
| 130 | No  | IPI00792115.1        | Putative uncharacterized protein DKFZp686H17246                              | 160         |             |             |             |             | 1.67        | 0.58        | 2.33        | 0.58        |
| 131 | Yes | <b>IPI00218413.2</b> | <b>Biotinidase</b>                                                           | <b>543</b>  |             |             |             |             | <b>0.67</b> | <b>0.58</b> | <b>1.33</b> | <b>0.58</b> |
| 131 | No  | IPI00744685.3        | Putative uncharacterized protein BTDC                                        | 545         |             |             |             |             | 0.67        | 0.58        | 1.33        | 0.58        |
| 131 | No  | IPI00927683.1        | cDNA FLJ51892, highly similar to Biotinidase                                 | 545         |             |             |             |             | 0.67        | 0.58        | 1.33        | 0.58        |
| 132 | Yes | <b>IPI00291866.5</b> | <b>Plasma protease C1 inhibitor</b>                                          | <b>500</b>  | <b>0.33</b> | <b>0.58</b> | <b>0.67</b> | <b>0.58</b> | <b>0.33</b> | <b>0.58</b> | <b>0.33</b> | <b>0.58</b> |
| 132 | No  | IPI00879931.1        | cDNA FLJ58826, highly similar to Plasma protease C1 inhibitor                | 543         | 0.33        | 0.58        | 0.67        | 0.58        | 0.33        | 0.58        | 0.33        | 0.58        |
| 133 | Yes | <b>IPI00020091.1</b> | <b>Alpha-1-acid glycoprotein 2</b>                                           | <b>201</b>  |             |             | <b>1.67</b> | <b>1.15</b> |             |             |             |             |
| 134 | Yes | <b>IPI00299503.2</b> | <b>Isoform 1 of Phosphatidylinositol-glycan-specific phospholipase D</b>     | <b>840</b>  |             |             |             |             |             |             | <b>0.67</b> | <b>0.58</b> |
| 135 | Yes | <b>IPI00384401.1</b> | <b>Myosin-reactive immunoglobulin kappa chain variable region (Fragment)</b> | <b>109</b>  | <b>0.33</b> | <b>0.58</b> | <b>1.00</b> | <b>1.00</b> |             |             |             |             |
| 136 | Yes | <b>IPI00816799.1</b> | <b>Rheumatoid factor D5 light chain (Fragment)</b>                           | <b>118</b>  |             |             | <b>1.00</b> | <b>0.00</b> |             |             |             |             |
| 137 | Yes | <b>IPI00029168.1</b> | <b>Apolipoprotein(a)</b>                                                     | <b>4548</b> |             |             |             |             |             |             | <b>0.33</b> | <b>0.58</b> |
| 138 | Yes | <b>IPI00024825.2</b> | <b>Isoform A of Proteoglycan 4</b>                                           | <b>1404</b> |             |             |             |             |             |             | <b>0.33</b> | <b>0.58</b> |
| 138 | No  | IPI00655976.1        | Isoform C of Proteoglycan 4                                                  | 1311        |             |             |             |             |             |             | 0.33        | 0.58        |
| 138 | No  | IPI00656092.1        | Isoform F of Proteoglycan 4                                                  | 1361        |             |             |             |             |             |             | 0.33        | 0.58        |
| 139 | Yes | <b>IPI00010295.1</b> | <b>Carboxypeptidase N catalytic chain</b>                                    | <b>458</b>  |             |             |             |             | <b>0.33</b> | <b>0.58</b> | <b>0.33</b> | <b>0.58</b> |
| 140 | Yes | <b>IPI00030739.1</b> | <b>Apolipoprotein M</b>                                                      | <b>188</b>  |             |             | <b>1.00</b> | <b>0.00</b> |             |             |             |             |
| 140 | No  | IPI00645213.1        | Apolipoprotein M, isoform CRA_a                                              | 116         |             |             | 1.00        | 0.00        |             |             |             |             |
| 141 | Yes | <b>IPI00479116.1</b> | <b>Carboxypeptidase N subunit 2</b>                                          | <b>545</b>  |             |             |             |             | <b>0.67</b> | <b>0.58</b> |             |             |
| 142 | Yes | <b>IPI00382440.1</b> | <b>Ig lambda chain V-IV region Hil</b>                                       | <b>107</b>  | <b>0.67</b> | <b>0.58</b> | <b>1.00</b> | <b>0.00</b> |             |             |             |             |
| 144 | Yes | <b>IPI00387116.1</b> | <b>Ig kappa chain V-III region NG9 (Fragment)</b>                            | <b>100</b>  |             |             | <b>0.33</b> | <b>0.58</b> |             |             |             |             |
| 145 | Yes | <b>IPI00004798.4</b> | <b>cDNA FLJ75207</b>                                                         | <b>258</b>  |             |             |             |             |             |             | <b>0.33</b> | <b>0.58</b> |
| 145 | No  | IPI00942117.1        | Cysteine-rich secretory protein 3                                            | 245         |             |             |             |             |             |             | 0.33        | 0.58        |
| 147 | Yes | <b>IPI00007199.4</b> | <b>Protein Z-dependent protease inhibitor</b>                                | <b>484</b>  |             |             |             |             |             |             | <b>0.33</b> | <b>0.58</b> |
| 148 | Yes | <b>IPI00473011.3</b> | <b>Hemoglobin subunit delta</b>                                              | <b>147</b>  |             |             | <b>0.33</b> | <b>0.58</b> |             |             |             |             |
| 148 | No  | IPI00654755.3        | Hemoglobin subunit beta                                                      | 147         |             |             | 0.33        | 0.58        |             |             |             |             |
| 149 | Yes | <b>IPI00022392.1</b> | <b>Complement C1q subcomponent subunit A</b>                                 | <b>245</b>  |             |             |             |             |             |             | <b>0.33</b> | <b>0.58</b> |
| 151 | Yes | <b>IPI00854644.2</b> | <b>similar to hCG1686089</b>                                                 | <b>152</b>  |             |             | <b>1.00</b> | <b>0.00</b> |             |             |             |             |
| 152 | Yes | <b>IPI00013933.2</b> | <b>Isoform DPI of Desmoplakin</b>                                            | <b>2871</b> |             |             | <b>0.33</b> | <b>0.58</b> | <b>0.33</b> | <b>0.58</b> |             |             |
| 153 | Yes | <b>IPI00021856.3</b> | <b>Apolipoprotein C-II</b>                                                   | <b>101</b>  |             |             | <b>0.33</b> | <b>0.58</b> |             |             |             |             |
